# Supplementary material for: Green Behavior: Factors Influencing Behavioral Intention and Actual Environmental Behavior of Employees in the Financial Service Sector
Source: MDPI journal article supplement (doi:10.3390/su141710814), 2022-08-30
Supplement: s1 [file s1]

## ***Survey about green behavior (German version)***

### **A Fragen zum aktuellen Nachhaltigkeitsverhalten**

1. Es ist spät und regnet draußen, aber du brauchst vom Supermarkt um die Ecke noch etwas.
  - a) Du nimmst 100%ig das Auto oder Taxi
  - b) Du nimmst ausnahmsweise das Auto, weil es regnet
  - c) Du gehst zu Fuß
  
2. Beim Einkaufen nimmst du...
  - a) eine Plastiktüte von zu Hause mit
  - b) einen Stoffbeutel von zu Hause mit
  - c) eine Tüte an der Kasse
  - d) eine Tüte aus der Gemüseabteilung, weil die nichts kostet
  
3. Wenn du aus dem Raum gehst
  - a) Machst du nur das Licht aus, wenn du länger den Raum verlässt
  - b) Brennt oft das Licht weiter
  - c) Machst du immer das Licht aus
  
4. Womit verreist du meistens in den Urlaub?
  - a) Zug, Bus oder Wanderurlaub
  - b) Auto oder Kurzstrecken-Flug
  - c) Langstreckenflug
  
5. Verzichtest du zugunsten der Umwelt bzw. der Sustainability auf Fleisch, Fisch oder andere tierische Produkte?
  - a) Nein! Tierische Lebensmittel gehören für mich zu einer richtigen Ernährung
  - b) Nein! Ich ernähre mich vegetarisch / vegan, aber nicht wegen der Umwelt
  - c) Ja, ich versuche der Umwelt zuliebe tierische Produkte zu reduzieren
  - d) Ja, ich ernähre mich vegetarisch / vegan um einen Beitrag zur Nachhaltigkeit zu leisten
  
6. Hast du in den letzten 12 Monaten Umweltschutzverbände oder ähnliche Organisationen mit Spenden finanziell unterstützt?
  - a) Ja – ich spende regelmäßig
  - b) Ja, ich spende manchmal anlassbezogen

- c) Nein, aber ich habe es mir vorgenommen
  - d) Nein
7. Hast du in den letzten 12 Monaten Umweltschutzverbände oder ähnliche Organisationen durch ehrenamtliches Engagement unterstützt?
- a) Ja – ich engagiere mich regelmäßig
  - b) Ich war vereinzelt bei Veranstaltungen, beispielsweise Fridays-for-future-Demos
  - c) Ich unterzeichne häufig Petitionen, die Umweltschutz und Nachhaltigkeit zum Ziel haben
  - d) Nein, aber ich habe es mir vorgenommen
  - e) Nein

### **B Fragen zur Meinung von Nachhaltigkeit**

Bitte bewerte die folgenden Aussagen zum Thema Nachhaltigkeit. 5 steht für „unterstütze ich vollumfänglich“ und 1 entspricht „stimme ich gar nicht zu“

- 8. Das Thema Nachhaltigkeit hat für unsere Gesellschaft eine hohe Bedeutung
- 9. Die Bedeutung, die Nachhaltigkeit in meinem Bekanntenkreis hat, beeinflusst mich stark
- 10. Das Thema Nachhaltigkeit hat für mich persönlich eine hohe Bedeutung
- 11. Die Politik sollte zügig drastische Maßnahmen ergreifen, um den Klimawandel zu stoppen
- 12. Ich akzeptiere es, wenn diese Maßnahmen Einfluss auf mein persönliches Leben haben (z. B. stärkere Besteuerung von tierischen Produkten oder Flügen)
- 13. Ich beschäftige mich mit meinem Ressourcenverbrauch, z. B. CO<sub>2</sub>-Fußabdruck
- 14. Ich setze mir persönliche Ziele für ein nachhaltigeres Leben und kontrolliere auch, ob ich sie erreiche
- 15. Projekte wie die Elbvertiefung in Hamburg halte ich für richtig, auch wenn dadurch Fische und Pflanzen sterben. Der Erhalt von Arbeitsplätzen hat für mich höhere Priorität
- 16. Einen Wald für eine ergänzende Startbahn am Flughafen abzuholzen halte ich für richtig

### **C Fragen zur Verhaltenseinschätzung**

#### *17. Situation 1: Projektanreise Berater*

Würdest du zugunsten der Nachhaltigkeit mit dem Zug statt mit dem Flugzeug zum Projekt anreisen?

- a) Auf keinen Fall – ich nehme immer die schnellste Verbindung
- b) Nur wenn der Zeitunterschied gering ist (< 1 Stunde)
- c) Ja, ich bin bereit, einen mittleren Zeitunterschied zu akzeptieren (< 3 Stunden)
- d) Ja, wo immer möglich und auch bei langen Zugfahrten (z. B. Hamburg – München) und Vorabendanreise

18. Wenn du für eine Projektanreise mit dem Zug höhere Spesen bekommen würdest als bei einem Flug, würdest du dann mit dem Zug statt mit dem Flugzeug reisen?
- a) Auf keinen Fall – ich nehme immer die schnellste Verbindung
  - b) Ich würde mit dem Zug anreisen, wenn es nur einen geringen Zeitrückstand ggü. dem Flugzeug gibt (< 1 Stunde)
  - c) Ich würde mit dem Zug anreisen, auch wenn es einen mittleren Zeitrückstand ggü. dem Flugzeug gibt (< 3 Stunden)
  - d) Ich würde mich wo möglich immer für den Zug entscheiden, auch bei langen Strecken (z. B. Hamburg – München) und wenn ich dafür am Vorabend anreisen muss
19. Stelle dir folgendes Szenario vor: Die regelmäßige Projektanreise montags morgens mit dem Flugzeug zum Kunden dauert von Tür zu Tür 3 Stunden, Ankunft mit dem frühesten Flieger ist 10:00 Uhr. Die Anreise mit dem Zug dauert 3 Stunden länger, insgesamt 6 Stunden von Tür zu Tür. Da ein Start nach 10:00 Uhr beim Kunden nicht möglich ist, ist mit dem Zug eine Anreise schon sonntags erforderlich, späteste Abreise um 17:00 Uhr.
- 1. Wenn dir eine monetäre Kompensation für längere Reisezeiten geboten würde, um wie viel Euro müssten sich im oben genannten Szenario die Spesen erhöhen, damit du die Zugfahrt im Kauf nimmst? \_\_\_\_ € (Zahleneingabe)
  - 2. Wenn dir eine zeitliche Kompensation für längere Reisezeiten geboten würde, wie viele Stunden müssten dir im oben genannten Szenario auf einem Zeitkonto gutgeschrieben werden, damit du die Zugfahrt im Kauf nimmst? \_\_\_\_ Stunden (Zahleneingabe)
20. Wie wirkt es sich auf dein Reiseverhalten aus, wenn dein gesamtes Projektteam aus Nachhaltigkeitsgründen den Zug nimmt statt zu fliegen?
- a) Das beeinflusst mich nicht, ich nehme die für mich schnellste Verbindung
  - b) Ich nehme ebenfalls Zug, wenn es nur einen geringen Zeitrückstand ggü. dem Flugzeug gibt (< 3 Stunden), andernfalls fliege ich
  - c) Ich nehme ebenfalls den Zug, auch bei langen Strecken (z. B. Hamburg – München) und wenn ich dafür am Vorabend anreisen muss
21. Wie wirkt es sich auf dein Reiseverhalten aus, wenn die relevanten Partner in deinem Umfeld (z. B. Projektverantwortlicher) aus Nachhaltigkeitsgründen Wert auf eine Anreise mit dem Zug legen?
- a) Das beeinflusst mich nicht, ich nehme die für mich schnellste Verbindung innerhalb der Policy
  - b) Ich nehme ebenfalls Zug, wenn es nur einen geringen Zeitrückstand ggü. dem Flugzeug gibt (< 3 Stunden), andernfalls fliege ich
  - c) Ich nehme ebenfalls den Zug, auch bei langen Strecken (z. B. Hamburg – München) und wenn ich dafür am Vorabend anreisen muss

22. Arbeiten aus dem Home Office ist ein weiteres Mittel, den Ressourcenverbrauch für Mobilität zu senken. Bitte bewerte die folgenden Aussagen zum Thema Home Office. 5 steht für „unterstütze ich vollumfänglich“ und 1 entspricht „stimme ich gar nicht zu“. Gemeint ist „normales“ Home Office, nicht die Corona-Ausnahmesituation.
- d) Physische Präsenz beim Kunden vor Ort ist unverzichtbar, Nachhaltigkeitsfragen müssen zurückstehen
  - e) Die Nachteile vom Home Office nehme ich gerne in Kauf, um Ressourcen zu schonen
  - f) Home Office ist nicht nur besser für die Umwelt, ich bin auch produktiver
  - g) Wenn ich deutlich mehr von zu Hause arbeite, fürchte ich um meine Privilegien bei Bonusprogrammen von Hotels und Fluglinien
  - h) Mein Unternehmen sollte den Kunden die Möglichkeit der Remote-Arbeit als nachhaltige Option ausdrücklich anbieten
23. Welchen Prozentsatz deiner Tätigkeit könntest du (optimale Technik vorausgesetzt) ohne inhaltliche Abstriche genauso gut aus dem Home Office erledigen? \_\_\_\_ % (Zahleneingabe)
24. Wie viel häufiger würdest du das Home Office nutzen, wenn es vom Projektleiter und/oder Mentor ausdrücklich befürwortet würde?
- a. Wann immer möglich
  - b. viel häufiger
  - c. etwas häufiger
  - d. gar nicht häufiger

### *Situation 2: Ernährung*

25. Eine ressourcenschonende Ernährung ist pflanzenbasiert und verwendet regionale und saisonale Produkte. Planst du, deine Ernährung aus Nachhaltigkeitsgründen umzustellen? (D. h. keine/wenig tierische Produkte; keine Südfrüchte wie Orangen, Mangos, Kiwis; frische Lebensmittel wie Obst und Gemüse je nach Saison).
- a) Nein – ich esse, was mir schmeckt
  - b) Ich reduziere klimaschädliche Lebensmittel, aber der frisch gepresste Orangensaft am Wochenende muss sein (Beispiel)
  - c) Ich ernähre mich bereits überwiegend nachhaltig.
26. Wie würde es dein Ernährungsverhalten beeinflussen, wenn eine nachweislich nachhaltige Ernährungsform (wie beschrieben) zu finanziellen Vorteilen (z. B. über Steuererleichterungen, Subventionen oder Cashback) führen würde?
- a) Gar nicht – ich esse, was mir schmeckt. Geld hat keinen Einfluss auf meine Entscheidung
  - b) Bei finanziellen Anreizen würde ich meine Ernährung teilweise umstellen
  - c) Bei finanziellen Anreizen würde ich meine Ernährung konsequent umstellen.
  - d) Ich ernähre mich bereits nachhaltig und brauche dafür keine finanziellen Anreize

27. Wie würde es dein Ernährungsverhalten beeinflussen, wenn sich dein gesamtes Umfeld nachhaltig ernährt?
- a) Gar nicht – leckeres, individuelles Essen ist mir wichtig. Was andere essen ist mir egal
  - b) In manchen Bereichen würde ich mich anpassen. Aber es gibt Sachen, auf die ich nicht verzichten werde
  - c) Wenn mein Umfeld sich umstellt, dann mache ich das auch
  - d) Ich ernähre mich ohnehin nachhaltig und bin damit Vorbild für mein Umfeld

### *Situation 3: Auto*

28. Das Autofahren als Symbol für die individuelle Mobilität ist häufig in den Medien wenn es um das Thema Nachhaltigkeit und CO<sub>2</sub>-Verbrauch geht. Bitte bewerte die folgenden Aussagen zum Thema Nachhaltigkeit. 5 steht für „unterstütze ich vollumfänglich“ und 1 entspricht „stimme ich gar nicht zu“
- a) Beim Thema Auto schränke ich mich nicht ein
  - b) Um CO<sub>2</sub> zu sparen, bin ich bereit, ein kleineres Auto zu fahren, als ich mir wirtschaftlich leisten kann und ich mir sonst kaufen würde
  - c) Um CO<sub>2</sub> zu sparen, bin ich bereit, ein E-Auto mit Ökostrom zu fahren
  - d) Ich bin bereit, mein Auto viele Jahre zu nutzen, um den Ressourcenverbrauch zu reduzieren
  - e) Ich bin bereit, aus Nachhaltigkeitsgründen auf den Zweitwagen im Haushalt zu verzichten
  - f) Ich bin bereit, aus Nachhaltigkeitsgründen mein Auto abzuschaffen bzw. alle Autos im Haushalt abzuschaffen
29. Wenn der öffentliche Nahverkehr umsonst wäre und das Auto deutlich stärker besteuert würde, würdest du deine Autonutzung anpassen?
- a) Nein. Beim Thema Auto würde ich mich nicht einschränken, unabhängig von den Kosten und möglichen Ersparnissen
  - b) Soweit es geht, würde ich das Auto stehen lassen, um Geld zu sparen
  - c) Bei starken finanziellen Anreizen würde ich mein Auto abschaffen und meine Mobilität anpassen
  - d) Ich habe mein Auto bereits abgeschafft, auch ohne finanzielle Anreize
30. Wenn die Mehrheit deines Umfelds für eine nachhaltige Mobilität das Auto abgeben und auf öffentliche Verkehrsmittel umsteigen würde, würdest du dich anpassen und dein Auto ebenfalls abgeben?

- a) Nein, beim Thema Auto werde ich mich nicht einschränken
- b) Vielleicht steige ich dann auf ein kleineres Auto oder ein E-Auto um
- c) Ja, ich würde dann auch mein Auto abgeben
- d) Ich habe mein Auto bereits abgeschafft und bin damit Vorbild für mein Umfeld

### 31. Allgemein:

Verhalten lässt sich durch Anreize beeinflussen. Bitte bewerte, welche Bedeutung die genannten Anreizmöglichkeiten für dich haben. 5 steht für „äußerst wichtig“ und 1 entspricht „völlig unwichtig“

- 1. Gefühl, das Richtige zu tun
- 2. Geld oder geldwerte Belohnung
- 3. Menschen, die für mich Vorbilder sind, leben das Verhalten vor
- 4. Anerkennung im Familien- und Freundeskreis
- 5. Mein disziplinarisch Vorgesetzter lebt das Verhalten vor

### Sozialökonomische Fragen:

32. Welches Geschlecht hast du?

- a) Mann
- b) Frau
- c) divers

33. Wie alt bist du? (Altersspannen)

- a) 20-25 Jahre
- b) 26-30 Jahre
- c) 31-35 Jahre
- d) 36-40 Jahre
- e) 41-45 Jahre
- f) 46-50 Jahre
- g) >51 Jahre

34. Was ist dein Funktionslevel?

- Unteres Management
- a) Consultant
- b) Senior Consultant
- Mittleres Management
- c) Manager
- d) Senior Manager
- Top-Management
- e) Head

- f) Partner  
Verwaltung / Support-Funktion
- g) Professional
- h) Senior Professional
- i) Expert
- j) Manager Internal

35. In welchem geografischen Raum lebst du?

- a) Millionenstadt (ab 1 Mio. Einwohner)
- b) Großstadt (zwischen 100.000 und 999.999 Einwohner)
- c) Mittelstadt (zwischen 20.000 und 99.999 Einwohner)
- d) Kleinstadt (zwischen 5.000 und 19.999 Einwohner)
- e) Ländliches Gebiet (unter 5.000 Einwohner)

36. Hast du Kinder?

- a) ja
- b) nein
